# Supplementary material for: Precipitation and Crystallization Kinetics in Silica Gardens
Source: PubMed Central journal article supplement — Chemphyschem. 2017 Jan 18;18(4):338–45. doi: 10.1002/cphc.201600748 (PMC5347931; doi:10.1002/cphc.201600748), 2017-01-18
Supplement: CPHC-18-338-s001.pdf [file CPHC-18-338-s001.pdf]

# CHEMPHYSICHEM

## Supporting Information

### **Precipitation and Crystallization Kinetics in Silica Gardens**

Fabian Glaab,<sup>[b]</sup> Julian Rieder,<sup>[b]</sup> Regina Klein,<sup>[b]</sup> Duane Choquesillo-Lazarte,<sup>[c]</sup> Emilio Melero-García,<sup>[c]</sup> Juan-Manuel García-Ruiz,<sup>[c]</sup> Werner Kunz,<sup>\*,[b]</sup> and Matthias Kellermeier<sup>\*,[a]</sup>

cphc\_201600748\_sm\_miscellaneous\_information.pdf

## Supporting Information

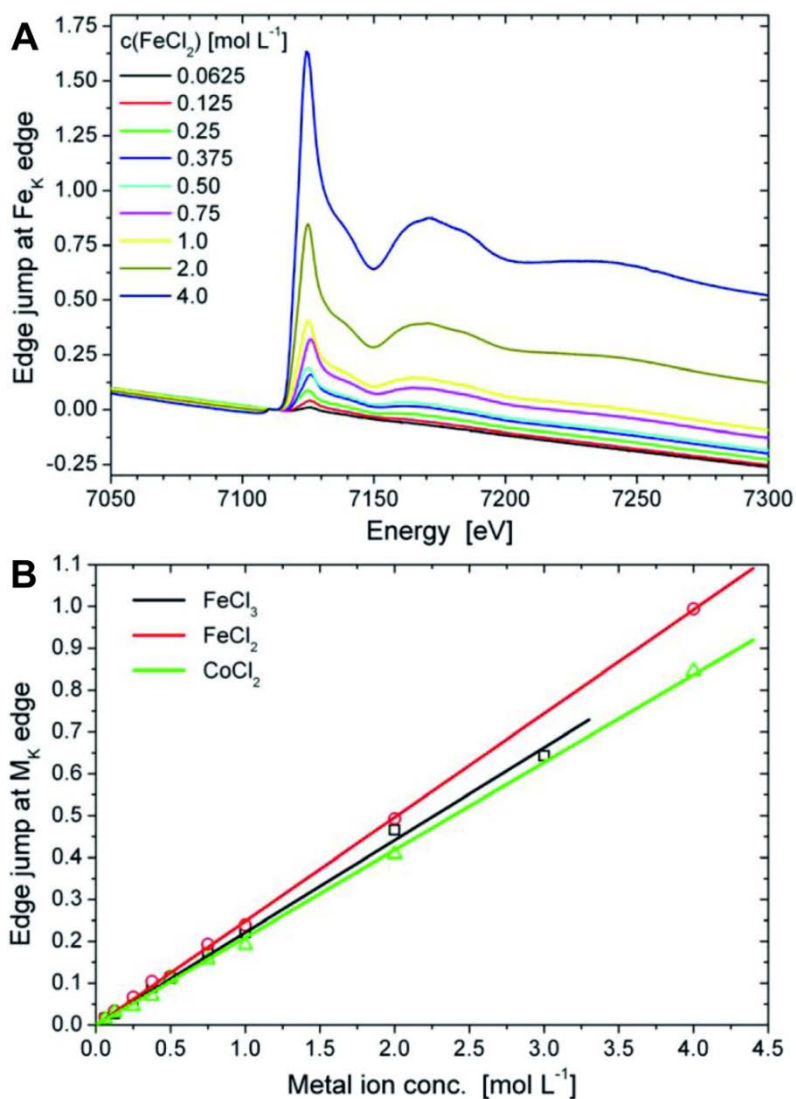

**Figure S1.** Metal ion concentration measurements by X-ray absorption spectroscopy (XAS). (A) Fe<sub>K</sub> absorption edge measured for aqueous solutions of FeCl<sub>2</sub>, at different concentrations as indicated. (B) Linear correlation between the height of the edge jump and corresponding metal ion concentrations for solutions of FeCl<sub>3</sub> (black), FeCl<sub>2</sub> (red) and CoCl<sub>2</sub> (green).

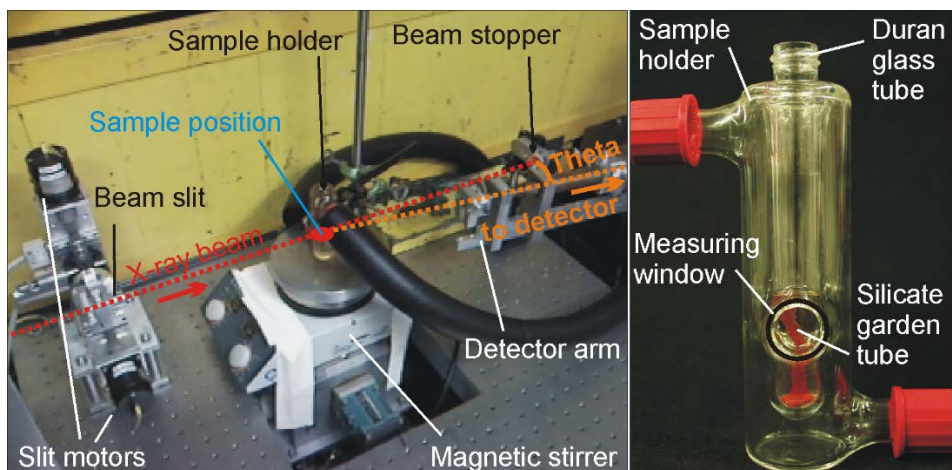

**Figure S2.** Experimental setup at beamline F3 of HASYLAB (DESY, Hamburg) used for EDXRD measurements on macroscopic open-tube silica gardens.

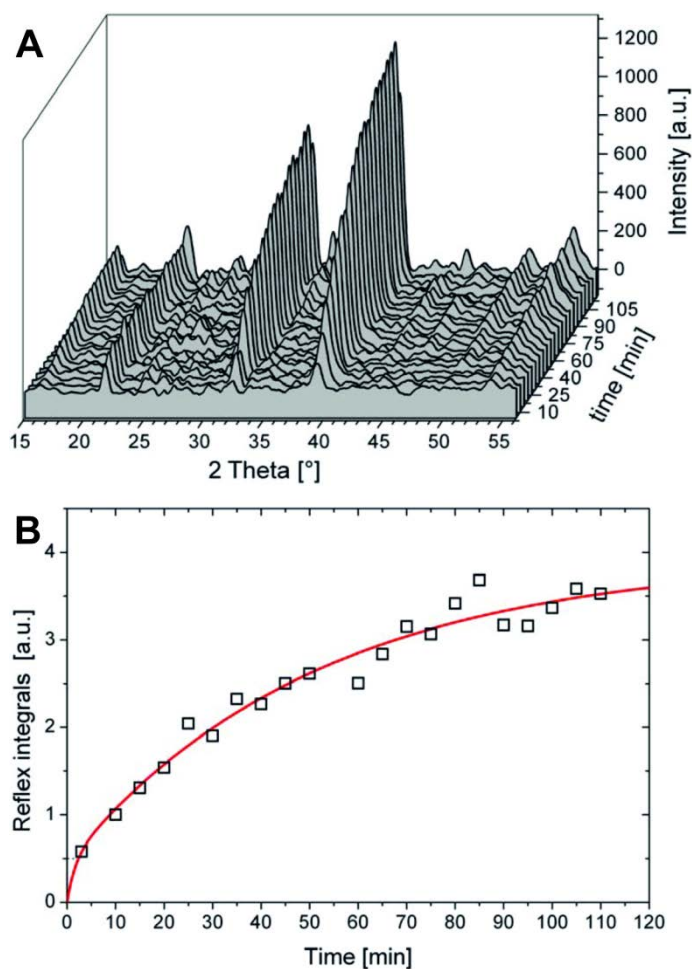

**Figure S3.** Results of EDXRD experiments on macroscopic silica garden tubes prepared with  $\text{CoCl}_2$ . (A) 3D representation of diffraction patterns measured at different times, showing progressive crystallization of  $\text{Co}_2(\text{OH})_3\text{Cl}$ . (B) Plot of the integral intensity of crystalline reflections occurring in (A) as a function of time. The red line represents a fit of the data according to the kinetic model described in the main text (Figure 5).

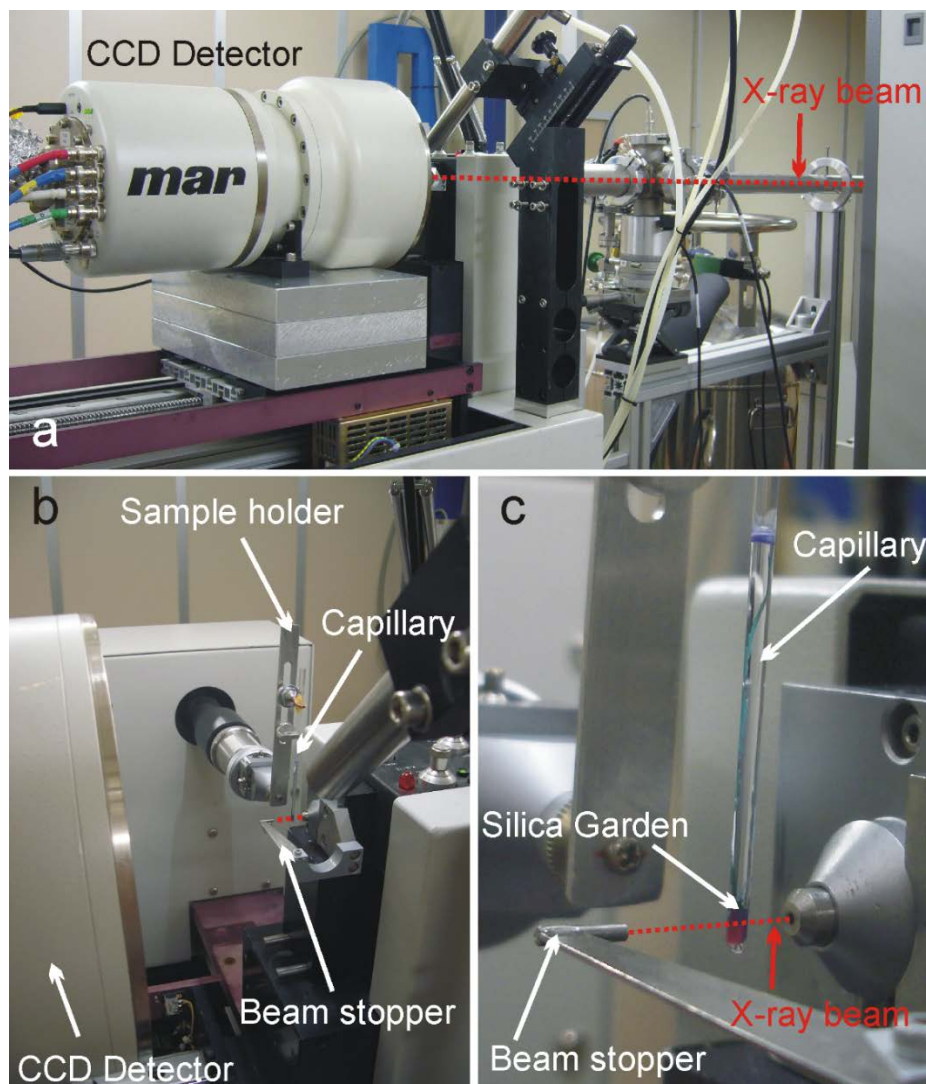

**Figure S4.** Experimental setup at beamline XRD1 of ELETTRA (Trieste) used for diffraction measurements on miniaturized silica garden tubes. (A) Overview showing the incoming X-ray beam and the used CCD detector. (B) Close-up view on the space between sample and detector. (C) Zoom into the sample area, showing a glass capillary containing a miniaturized silica garden prepared from a  $\text{CoCl}_2$  crystal.
